# Supplementary material for: Evaluation of the Antiseizure Activity of Endemic Plant Halfordia kendack Guillaumin and Its Main Constituent, Halfordin, on a Zebrafish Pentylenetetrazole (PTZ)-Induced Seizure Model
Source: MDPI journal article supplement (doi:10.3390/ijms24032598), 2023-01-30
Supplement: s1 [file s1]

**Table S1.** Primer sequences

| Gene            | Forward 5'-3'          | Reverse 5'-3'                 | Accession no/source |
|-----------------|------------------------|-------------------------------|---------------------|
| <i>c-fos</i>    | GTGCAGCACGGCTTCACCGA   | TTGAGCTGCGCCGTTGGAGG          | NM_205569.1         |
| <i>bdnf</i>     | GGCGAAGAGCGGACGAATATC  | AAGGAGACCATTTCAGCAGGACAG      | NM_131595.2         |
| <i>htr1aa</i>   | CAGAGCAGAGCAGCACAAAG   | TGGTCTGAGAGTTCTGGTCTAATC      | NM_001123321.1      |
| <i>htr1b</i>    | GTGTCGGTGCTCGTGATG     | CAGCCAGATGTCGCAGATG           | NM_001128709.1      |
| <i>htr2b</i>    | GCTGCTCATTCTTCTGGTCAT  | GTTAGTGGCGTTCTGGAGTT          | NM_001044743.1      |
| <i>gabarapa</i> | AGGATCCACTTGAGGGCTGA   | CTTCTTCGTGATGCTCCTGGT         | NM_001013260.1 /    |
| <i>gabaraph</i> | TGTAAACAACGTCATTCCCCCT | ATCTTCTTCGTGATGTTCTGGT        | NM_001386387.1      |
| <i>galn</i>     | AAGGATACTCCCAGTGCAAGG  | CTTCCTGCCAGTCCGTGTT           | NM_001346239.1      |
| <i>th1</i>      | GACGGAAGATGATCGGAGACA  | CCGCCATGTTCCGATTCT            | NM_131149.1 /       |
| <i>penka</i>    | CTTTGAGCGCCTGTCTCGTG   | TTCTAATGTGCAGGCCAGTGTG        | NM_200083.2         |
| <i>penkb</i>    | TGGTGGCAGGAGTCTAAACG   | TTGGACATCGCGGACATCAT          | NM_182883.1         |
| <i>ef1</i>      | CTGGAGGCCAGCTCAAACAT   | ATCAAGAAGAGTAGTACCGCTAGCATTAC |                     |

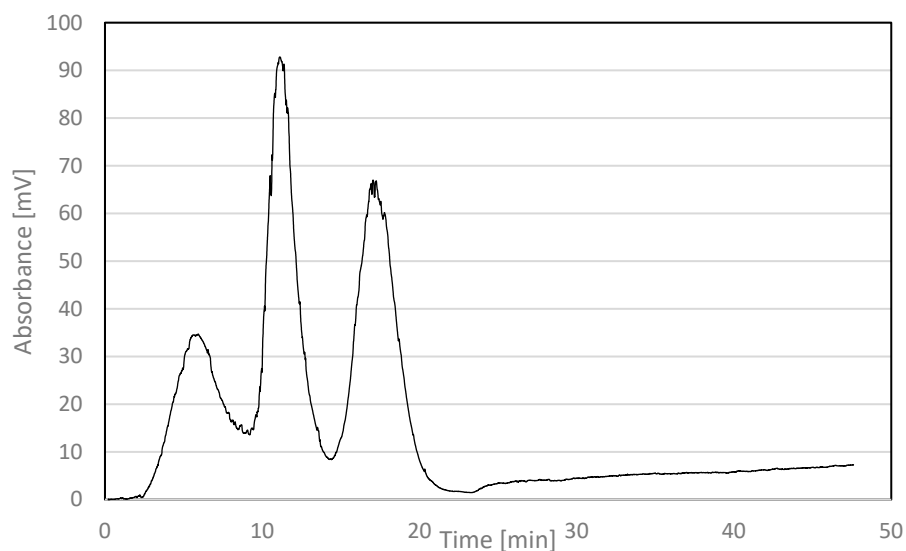

**Figure S1.** LLC chromatogram for the separation of halfordin from the methanol leaf extract of *H. kendack*. Operating conditions: Unit: CPC250; column volume 250 mL; solvent system *n*-hexane/ethyl acetate/methanol/water 3/1/3/1 (v/v/v/v); descending mode (lower phase as mobile phase); rotational speed 1700 rpm; flow rate 8 mL/min; sample 270 mg extract dissolved in 10 mL lower phase; injection volume 10 mL; UV 254 nm.
